# Supplementary material for: Photo-stability of peptide-bond aggregates: N-methylformamide dimers
Source: Royal Society of Chemistry journal article supplement (doi:10.1039/c4cp02518k), 2014-01-01
Supplement: c4cp02518k1.pdf [file c4cp02518k1.pdf]

## Supporting Information

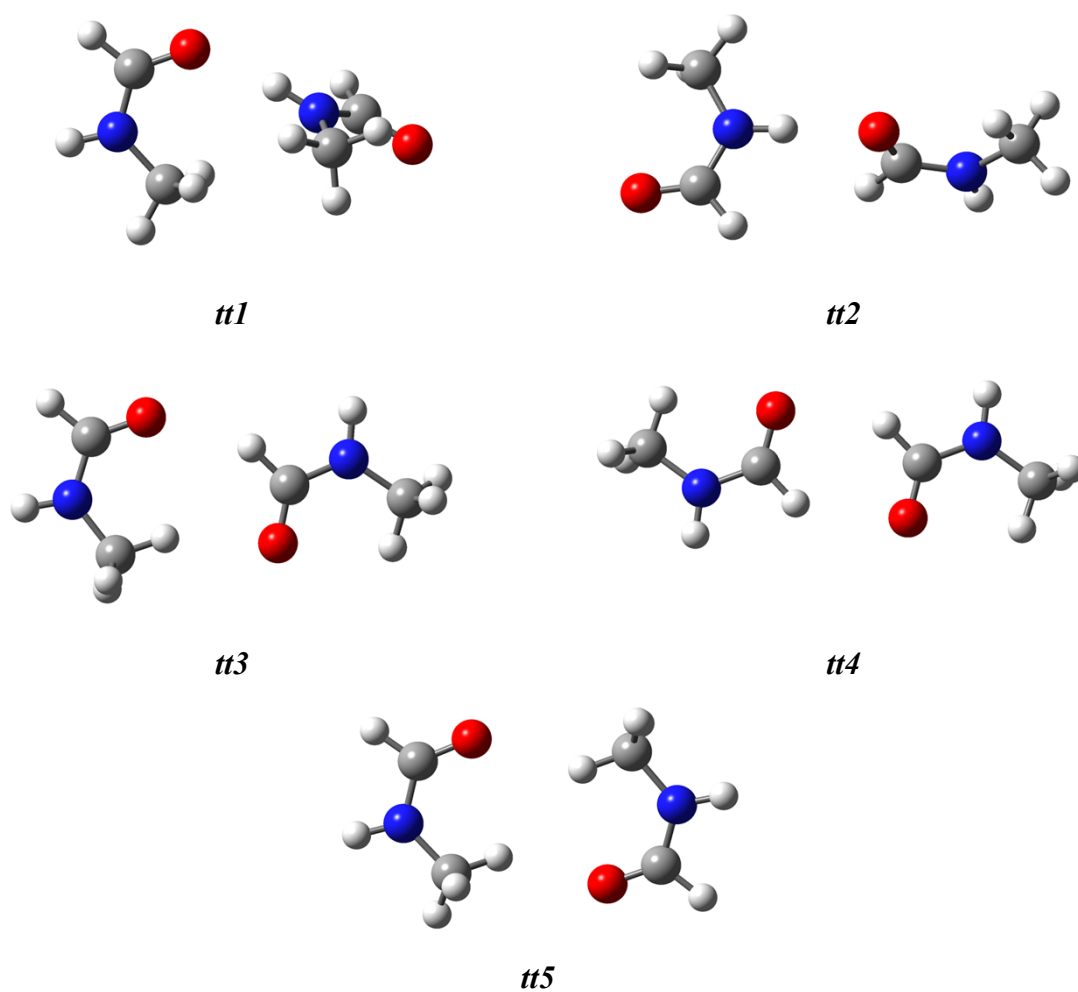

**Figure 1S.** *trans-trans* NMF dimers

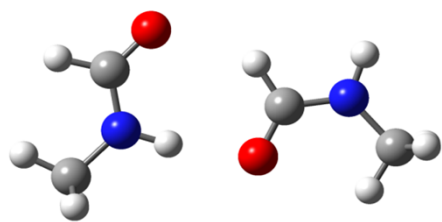

*tc1*

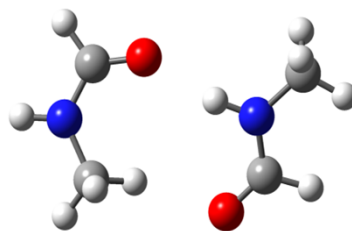

*tc2*

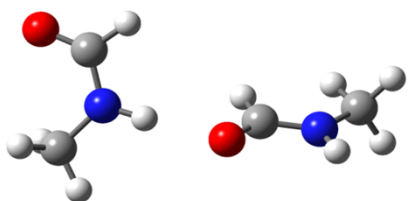

*tc3*

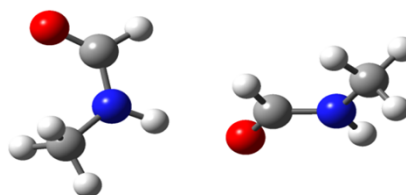

*tc4*

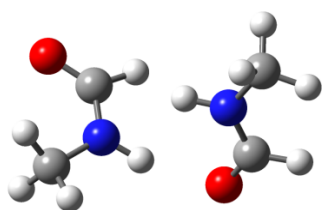

*tc5*

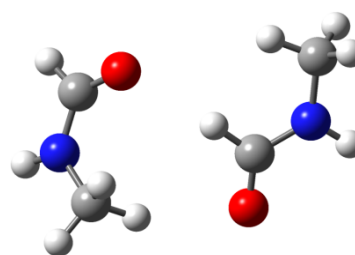

*tc6*

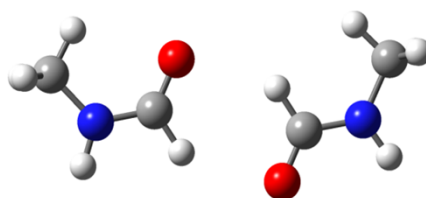

*tc7*

**Figure 2S.** *trans-cis* NMF dimers

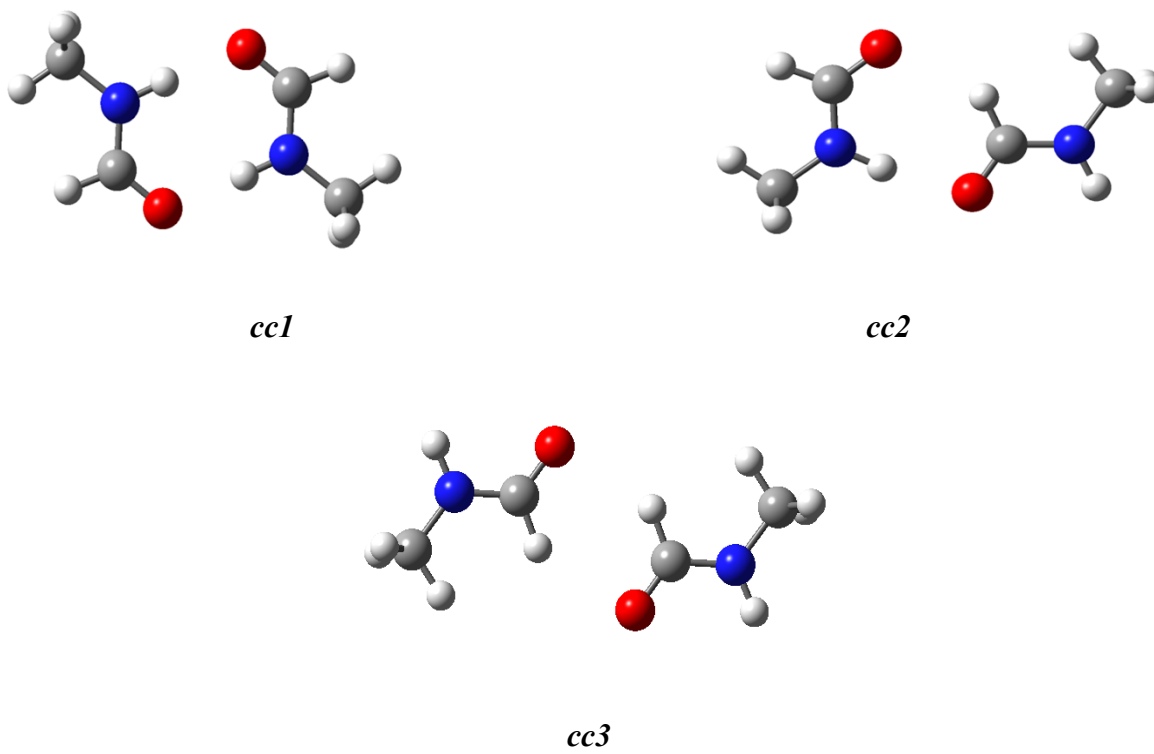

**Figure 3S.** *cis-cis* NMF dimers

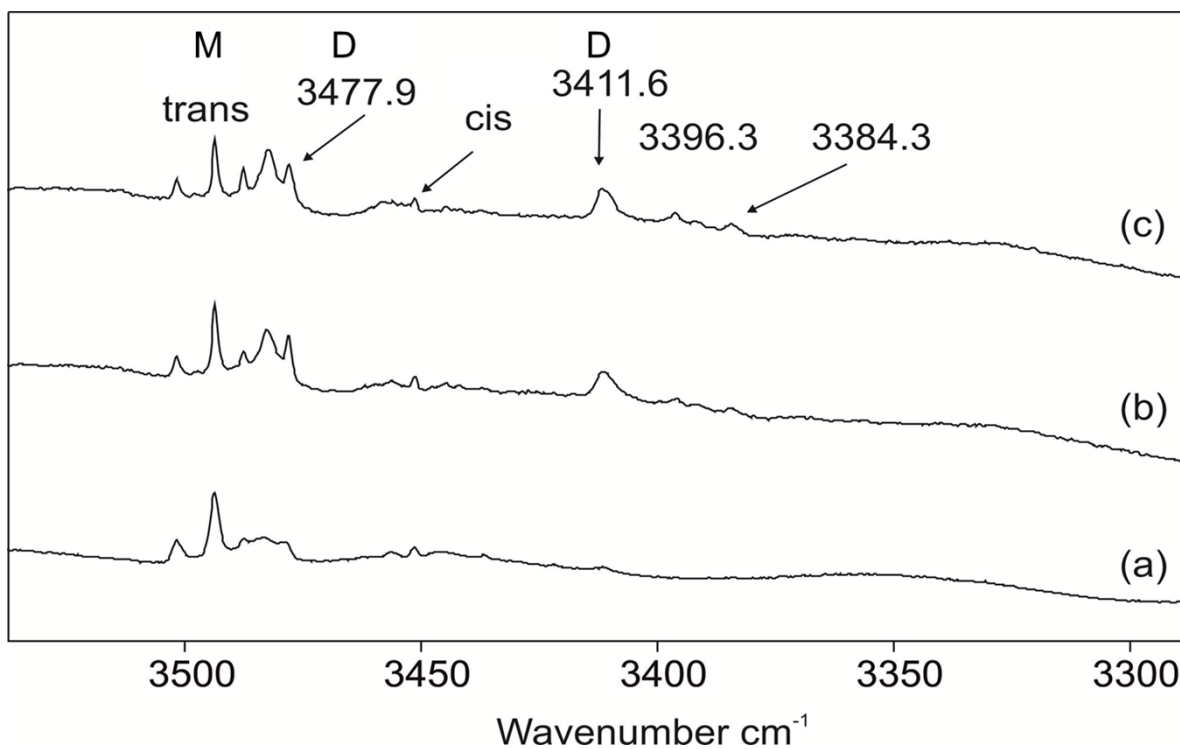

**Figure 4S.** Matrix-isolated IR spectra of NMF in the N–H stretching region. (a) IR spectrum of NMF in argon matrix at 10 K, temperature of the sample during deposition was kept at  $-35$  °C. (b) After annealing at 30 K during 15 minutes. (c) After annealing at 35 K during 15 minutes. Bands of monomeric NMF are marked as **M**, dimers as **D**. **D** signals are assigned to *tt-1* and *tt-2* dimers.

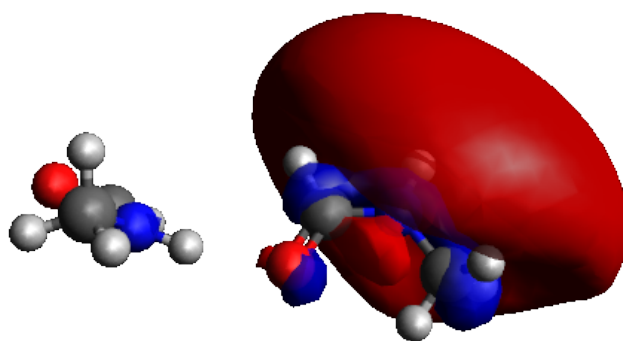

**Figure 5S.** The LUMO orbital is a Rydberg orbital located on B.

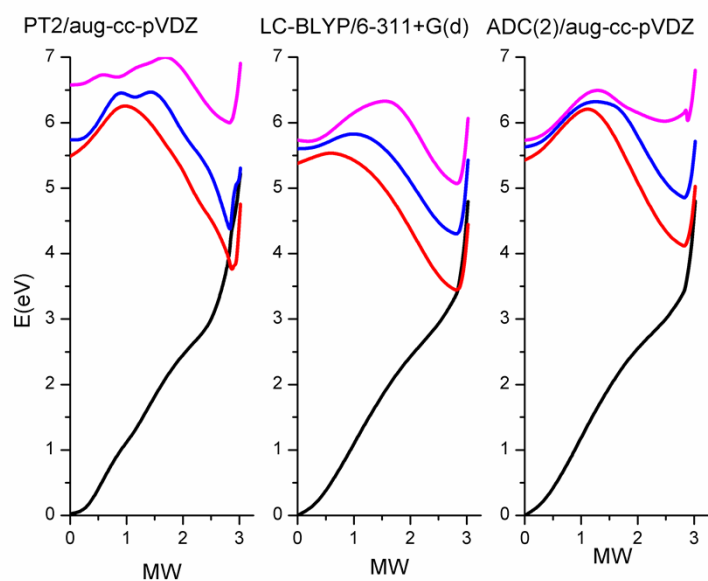

a.)

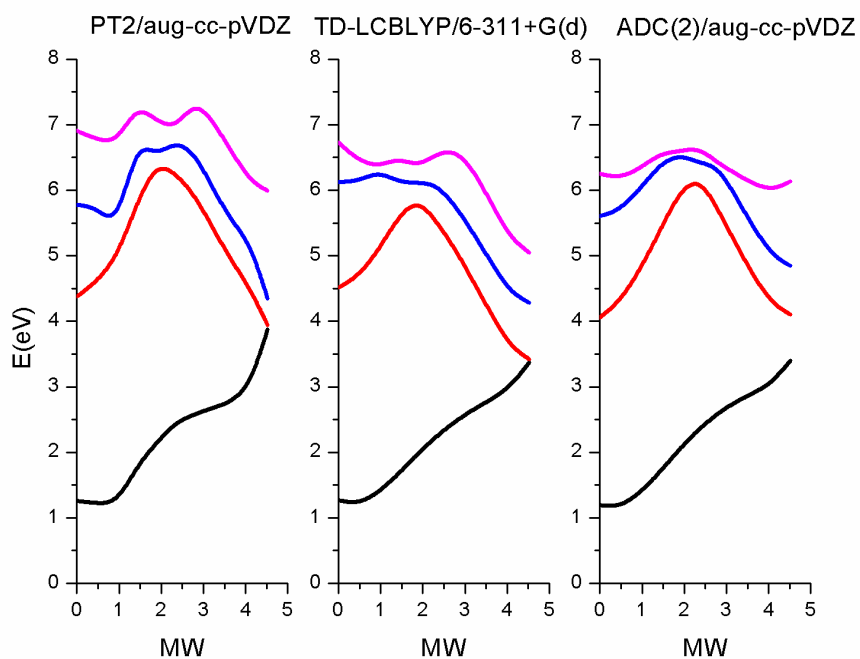

b.)

**Figure 6S.** a.) Linear interpolation between the Franck-Condon geometry and the crossing for the hydrogen-transfer process, *tt-1* dimer. b.) Linear interpolation between the minimum in  $S_1$  to the conical intersection for the hydrogen transfer process, *tt-1* dimer.

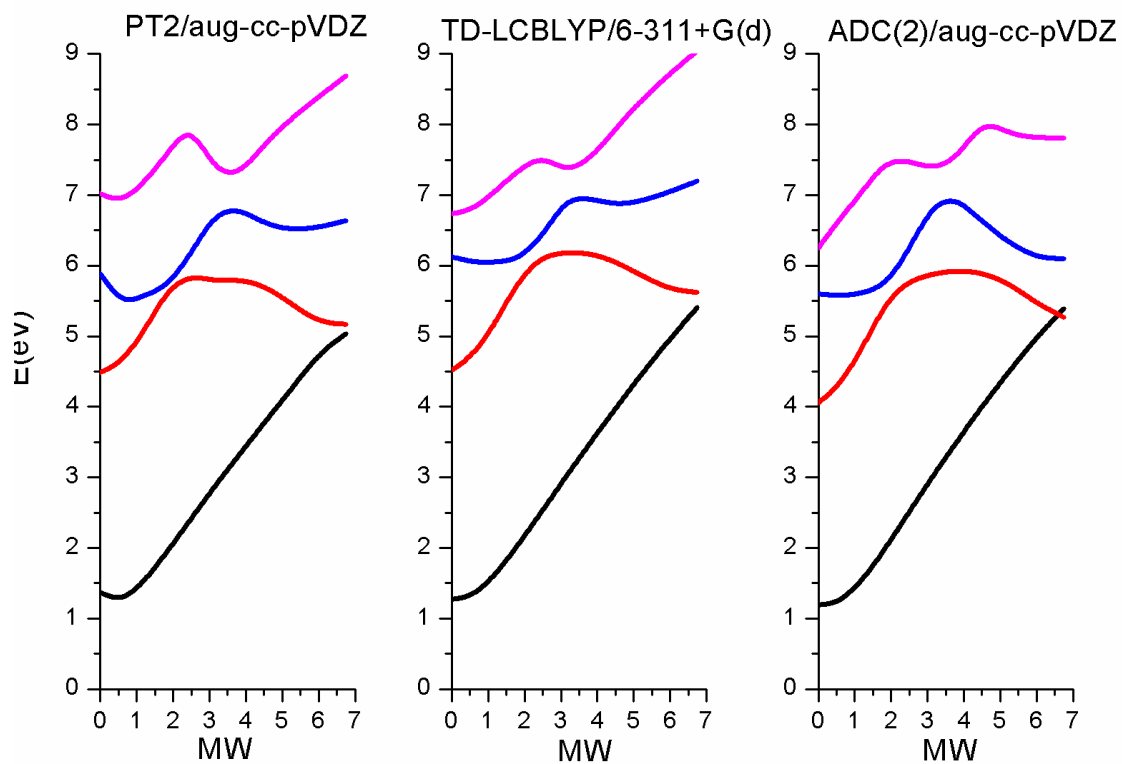

**Figure 7S.** Linear interpolation between the  $S_1$  geometry and the conical intersection for the CN breaking process in monomer A (CN-A), dimer *tt-1*

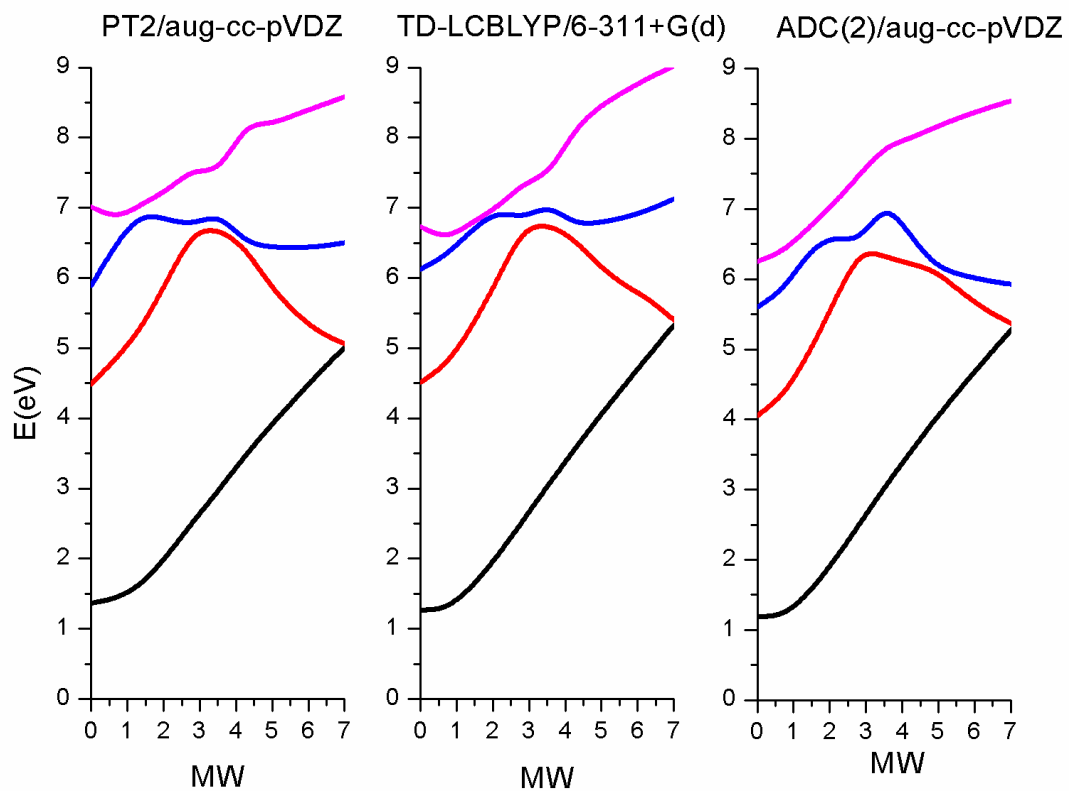

**Figure 8S.** Linear interpolation between the  $S_1$  geometry and the conical intersection for the CN breaking process in monomer B (CN-B), dimer *tt-1*



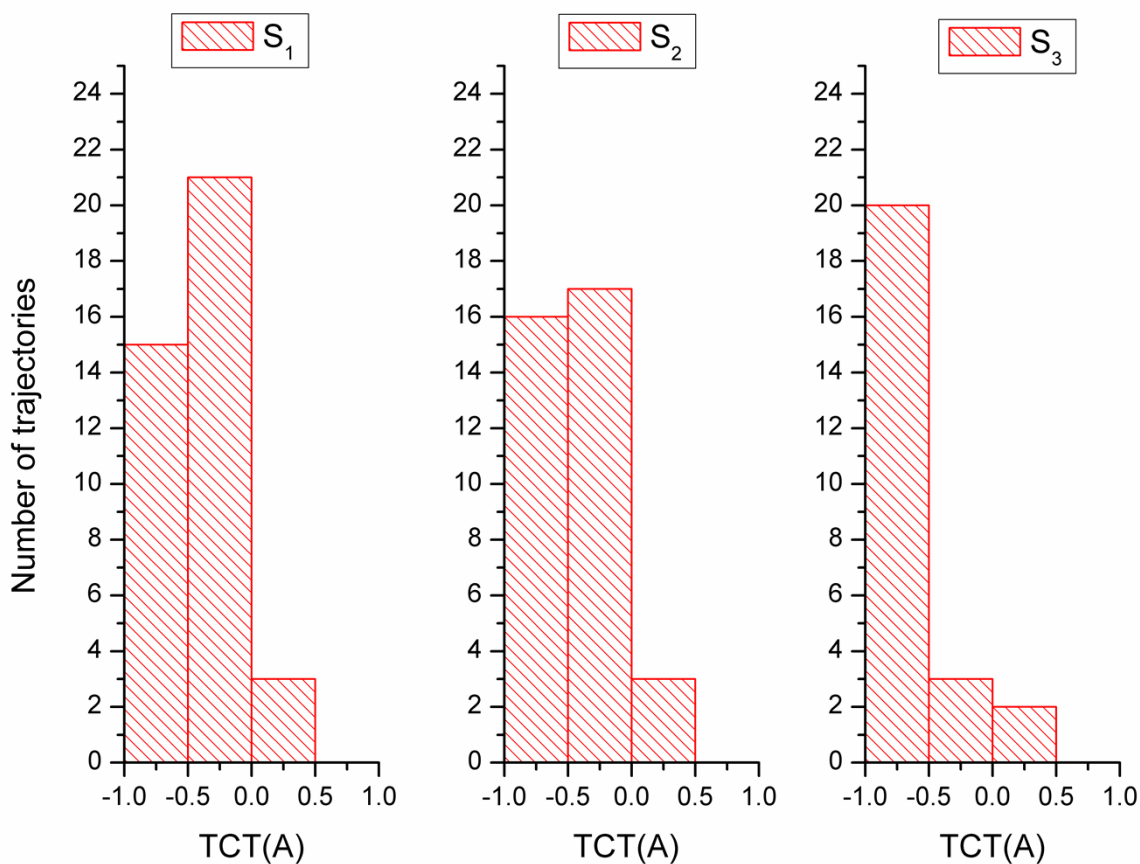

**Figure 9S.** Histograms showing the charge transfer TCT(A) parameter for all the initial conditions (all *tt-1* and *tt-2* trajectories were considered). The TCT(A) parameter ( $-1 < \text{TCT(A)} < 1$ ), which provides a characterization of the excited state according to charge transferred, was computed for every initial condition geometry. High negative values mean that the electron density is transferred from A to B, high positive values mean electron transfer from B to A. Intermediate values correspond to delocalized and highly localized excitations.

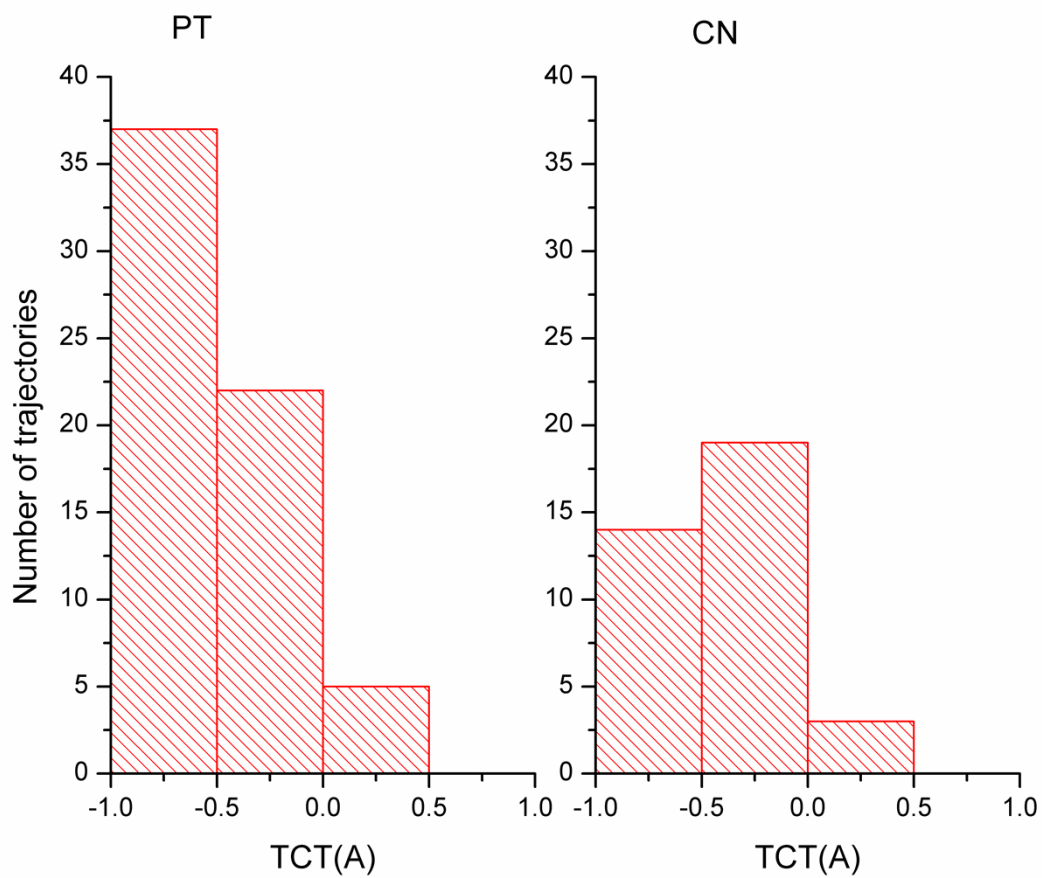

**Figure 10S.** Histograms showing the distribution of the charge transfer parameter for the initial conditions related to the hydrogen transfer and the dissociative trajectories (*tt-1* and *tt-2* together).

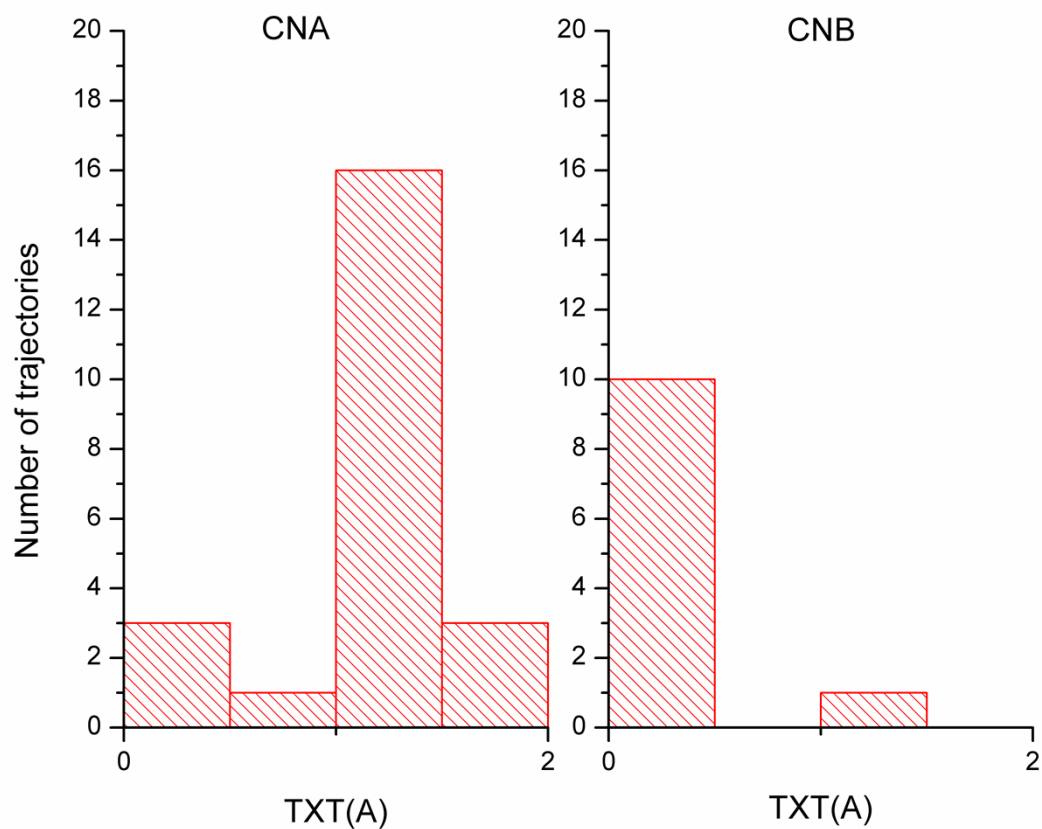

**Figure 11S.** Histograms showing the distribution of the  $\text{TXT(A)}$  parameter for the initial conditions related to the hydrogen transfer and the dissociative trajectories (*tt-1* and *tt-2* together). The  $\text{TXT(A)}$  parameter ( $0 < \text{TXT} < 2$ ) provides a measure of the localization of the excitation over one particular monomer. A value close to 2 means that the excitation is localized on A, a value close to 0 means that the excitation is localized on B; charge transfer states and delocalized states have intermediate values.

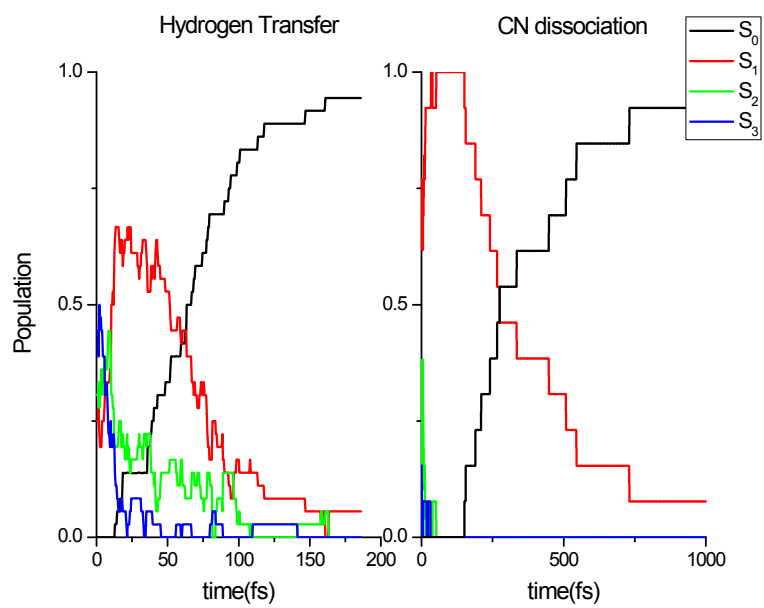

**Figure 12S.** Population of the different excited states vs. time for the hydrogen transfer trajectories.

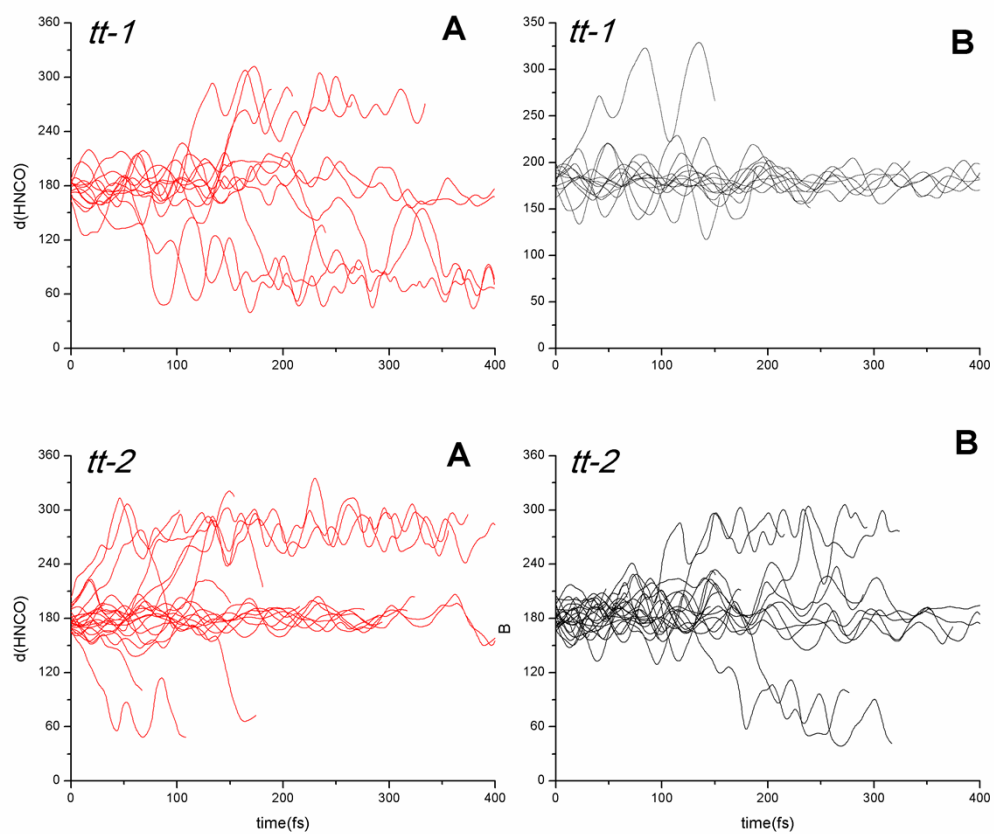

**Figure 13S.** Evolution of the HNC(O) angles in monomers A and B for the *tt-1* and *tt-2* isomers. Only CN trajectories are shown here.

**Table 1S.** Calculated stabilization energies and ZPE corrections for the NMF dimers at the B3LYP-D3/aug-cc-pVTZ level of theory.

| B3LYP-D3/aug-cc-pVTZ (kcal/mol) |            |     |                  |
|---------------------------------|------------|-----|------------------|
|                                 | $\Delta E$ | ZPE | $\Delta E + ZPE$ |
| <i>trans-trans</i>              |            |     |                  |
| <i>tt1</i>                      | -7.9       | 1.0 | -6.9             |
| <i>tt2</i>                      | -7.6       | 1.0 | -6.6             |
| <i>tt3</i>                      | -5.4       | 0.8 | -4.6             |
| <i>tt4</i>                      | -5.5       | 0.9 | -4.6             |
| <i>tt5</i>                      | -5.0       | 0.7 | -4.3             |
| <i>trans-cis</i>                |            |     |                  |
| <i>tc1</i>                      | -10.8      | 1.4 | -9.4             |
| <i>tc2</i>                      | -10.2      | 1.3 | -8.9             |
| <i>tc3</i>                      | -7.7       | 1.1 | -6.6             |
| <i>tc4</i>                      | -7.7       | 1.0 | -6.7             |
| <i>tc5</i>                      | -8.6       | 1.2 | -7.4             |
| <i>tc6</i>                      | -6.6       | 1.1 | -5.5             |
| <i>tc7</i>                      | -5.8       | 0.9 | -4.9             |
| <i>cis-cis</i>                  |            |     |                  |
| <i>cc1</i>                      | -16.5      | 1.8 | -14.7            |
| <i>cc2</i>                      | -11.1      | 1.4 | -9.7             |
| <i>cc3</i>                      | -6.0       | 0.9 | -5.1             |

**Table 2S.** Experimental (argon matrix) and calculated vibrational wavenumbers  $\kappa$  and shifts  $\Delta\kappa$  (in  $\text{cm}^{-1}$ ) of the *tt-3* and *tt-4* dimers. All the calculated wavenumbers were scaled using the factors shown in **Table 1**.

| Experimental                  |                | B3LYP-D3/aug-cc-pVTZ |                |             |                | Assignment             |
|-------------------------------|----------------|----------------------|----------------|-------------|----------------|------------------------|
| Argon<br>( $\text{cm}^{-1}$ ) |                | <i>tt-3</i>          |                | <i>tt-4</i> |                |                        |
| $\kappa$                      | $\Delta\kappa$ | $\kappa$             | $\Delta\kappa$ | $\kappa$    | $\Delta\kappa$ |                        |
| 946.6                         | -1.7           | 936.1                | -8.7           | 944.5       | -0.3           | C <sup>m</sup> -N str. |
| 951.5                         | +3.8           | 949.2                | +4.4           | 951.6       | +6.8           |                        |
| 1209.2                        | +3.7           | 1211.3               | +3.4           | 1206.4      | -1.5           | C-N str.               |
|                               |                | 1220.0               | +12.0          | 1215.9      | +8.0           |                        |
| 1688.9                        | -36.5          | 1690.9               | -33.4          | 1678.6      | -46.2          | C=O str.               |
|                               |                | 1720.3               | -4.5           | 1708.6      | -16.2          |                        |
|                               |                | 3487.9               | -5.3           | 3493.5      | +0.3           | N-H str.               |
| 3495.4                        | +2.2           | 3495.5               | +2.2           |             |                |                        |

**Table 3S.** Experimental (argon matrix) and calculated vibrational wavenumbers  $\kappa$  and shifts  $\Delta\kappa$  (in  $\text{cm}^{-1}$ ) of the *tc-1* and *tc-2* dimers (the shifts were computed with respect to the *cis* monomer). All the calculated wavenumbers were scaled using the factors shown in **Table 1**.

| Experimental                  |                | B3LYP-D3/aug-cc-pVTZ |                |             |                | Assignment             |
|-------------------------------|----------------|----------------------|----------------|-------------|----------------|------------------------|
| Argon<br>( $\text{cm}^{-1}$ ) |                | <i>tc-1</i>          |                | <i>tc-2</i> |                |                        |
| $\kappa$                      | $\Delta\kappa$ | $\kappa$             | $\Delta\kappa$ | $\kappa$    | $\Delta\kappa$ |                        |
| 946.6                         | -54.3          | 949.9                | -53.1          | 941.3       | -61.7          | C <sup>m</sup> -N str. |
| 1019.0 <sup>a</sup>           | +18.1          | 1028.4               | +25.4          | 1024.9      | +22.0          |                        |
|                               |                | 1221.3               | -69.1          | 1232.1      | -58.3          | C-N str.               |
| 1320.2 <sup>a</sup>           | +27.3          | 1338.0               | +47.6          | 1331.5      | +41.1          |                        |
| 1688.9                        | -41.7          | 1668.4               | -62.4          | 1691.1      | -39.7          | C=O str.               |
|                               |                | 1717.6               | -13.2          | 1721.3      | -9.5           |                        |
|                               |                | 3202.3               | -255.7         | 3295.3      | -162.6         | N-H str.               |
|                               |                | 3492.5               | +34.5          | 3494.0      | +36.1          |                        |

<sup>[a]</sup> Vibrational modes of the *cis*- conformer of NMF.



**Table 4S.** Vertical excitations ( $E$ ) and oscillator strengths ( $f$ ) calculated at the TD/LC-BLYP( $\mu=0.2$ )/6-311+G(d) level of theory for the *tt-1* and *tt-2* isomers in gas phase and considering the matrix as a continuum model (PCM, Argon as solvent).

| <i>tt-1</i>    | $E$ (eV)         |                    | $f$              |                    |
|----------------|------------------|--------------------|------------------|--------------------|
|                | <i>Gas Phase</i> | <i>PCM (Argon)</i> | <i>Gas Phase</i> | <i>PCM (Argon)</i> |
| S <sub>1</sub> | 5.43             | 5.49               | 0.002            | 0.002              |
| S <sub>2</sub> | 5.61             | 5.65               | 0.002            | 0.002              |
| S <sub>3</sub> | 5.80             | 5.90               | 0.003            | 0.004              |
| S <sub>4</sub> | 5.83             | 5.90               | 0.004            | 0.004              |
| S <sub>5</sub> | 6.07             | 6.14               | 0.002            | 0.002              |
| <i>tt-2</i>    | $E$ (eV)         |                    | $f$              |                    |
|                | <i>Gas Phase</i> | <i>PCM (Argon)</i> | <i>Gas Phase</i> | <i>PCM (Argon)</i> |
| S <sub>1</sub> | 5.46             | 5.51               | 0.004            | 0.004              |
| S <sub>2</sub> | 5.70             | 5.73               | 0.001            | 0.001              |
| S <sub>3</sub> | 5.74             | 5.86               | 0.003            | 0.003              |
| S <sub>4</sub> | 5.81             | 5.93               | 0.013            | 0.013              |
| S <sub>5</sub> | 6.04             | 6.10               | 0.007            | 0.006              |
